# Supplementary material
Source: MDPI journal article supplement (https://www.mdpi.com/2673-4125/3/2/21)
Supplement: s1 [file s1 › biophysica-2353382-supplementary.pdf]

## Supplementary Information

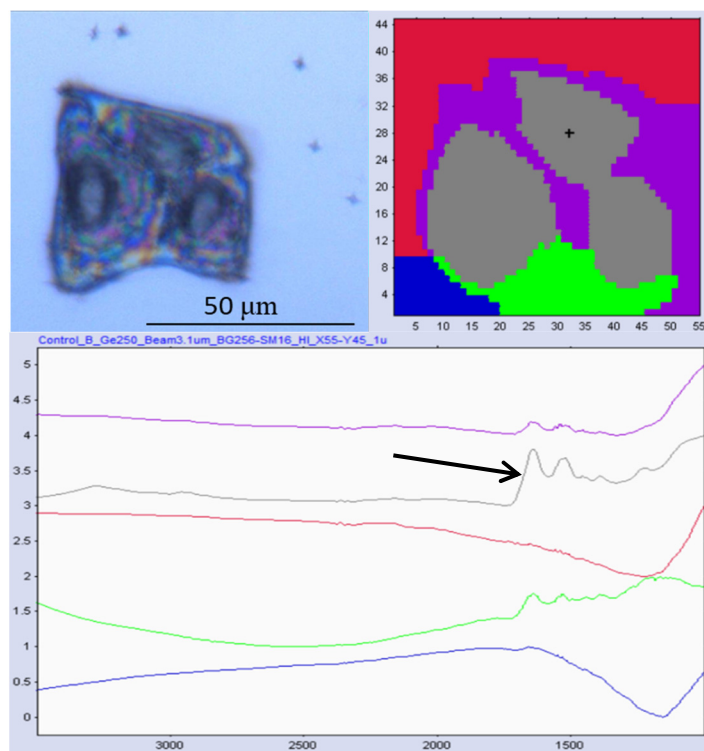

**Figure S1.** *Top left:* microscope image of fixed, untreated HaCat cells prior to the synchrotron macro-ATR-FTIR imaging. *Top right:* HCA image obtained from the corresponding synchrotron macro-ATR-FTIR dataset of the same HaCat cells. *Bottom:* five average spectra extracted from each of the five colored clusters. Note: black arrow indicates the spectral cluster selected for subsequent PCA analysis.

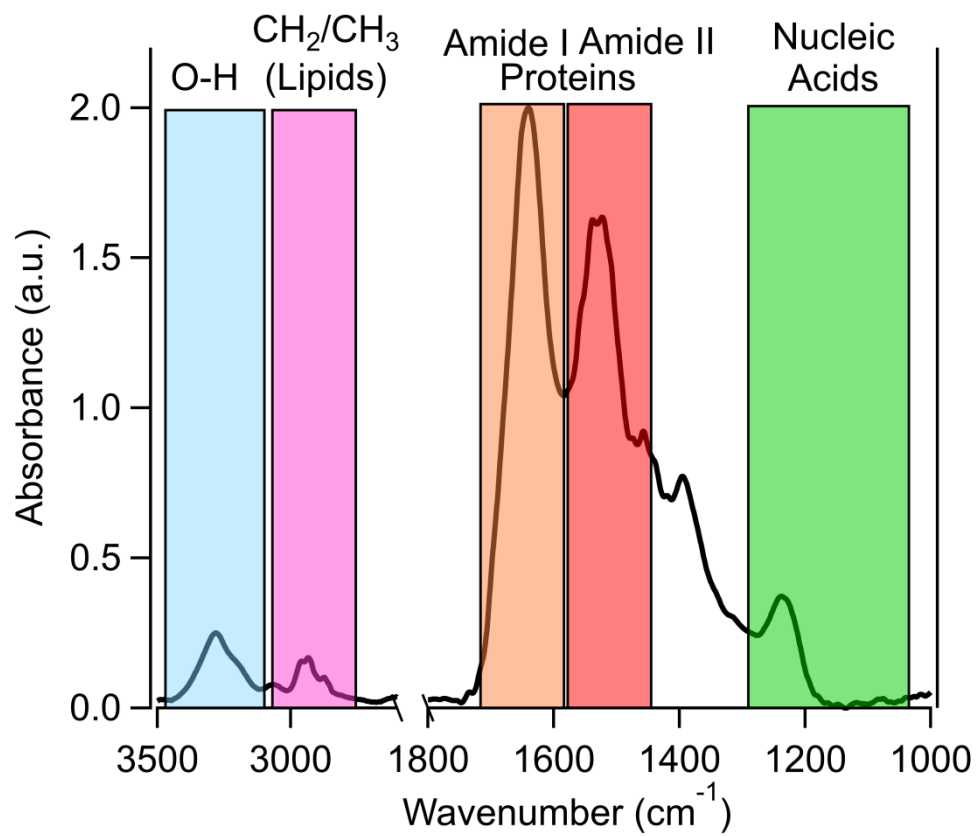

**Figure S2.** Regions of interest containing the key biochemical information in the acquired synchrotron macro-ATR-FTIR spectra.

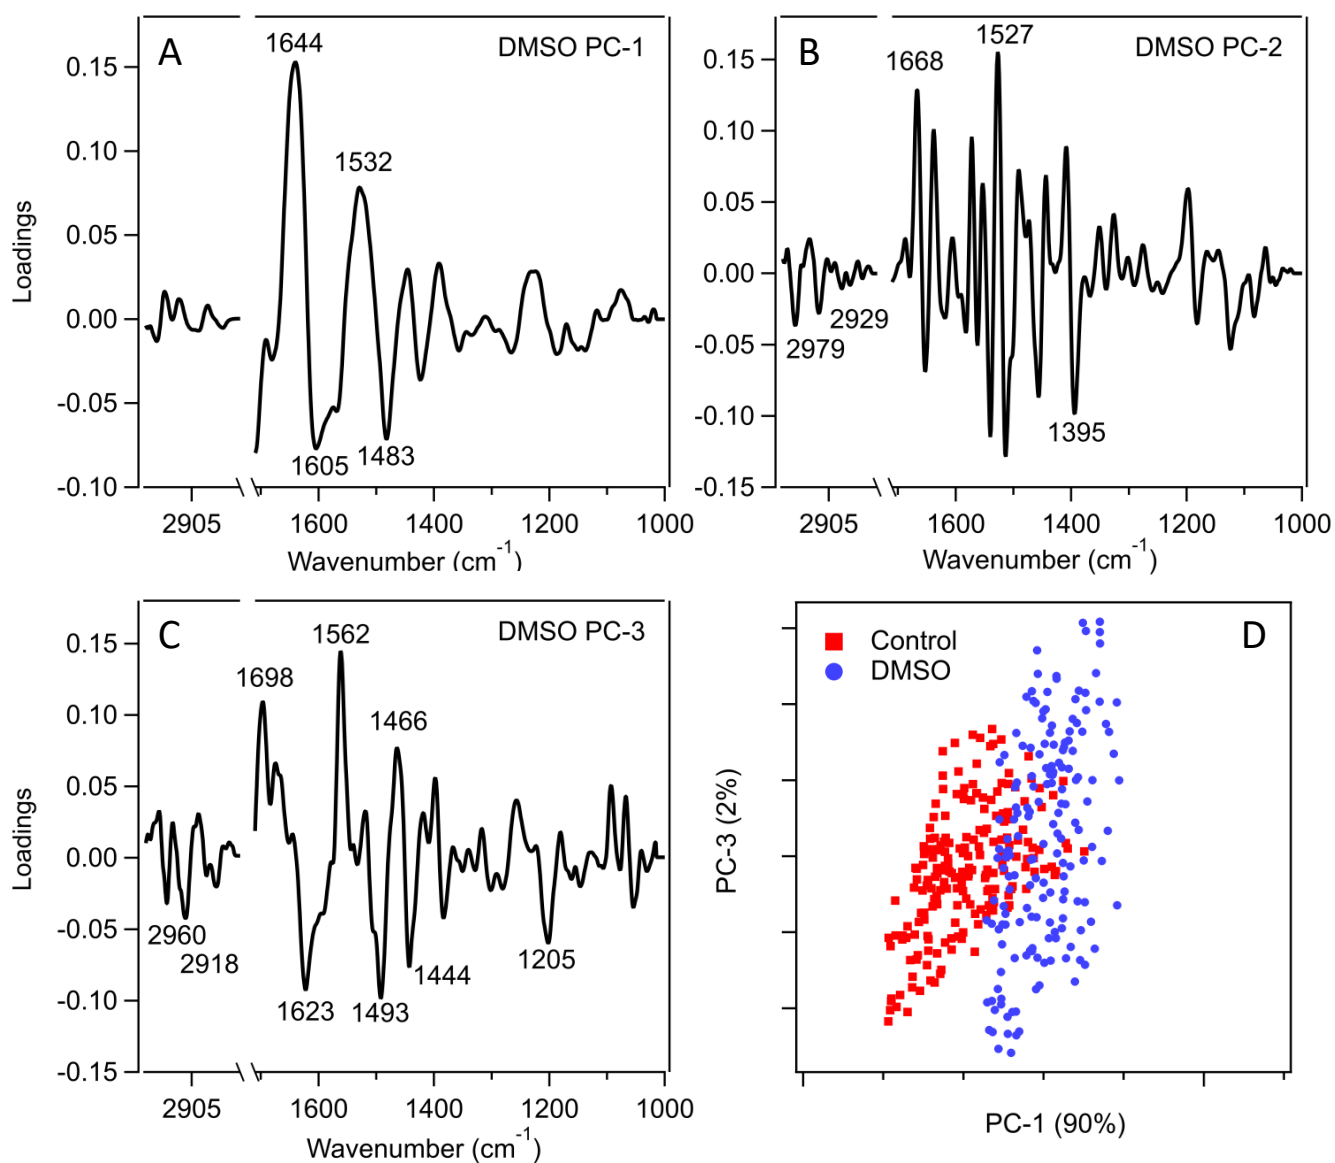

**Figure S3.** A-C) PCA loadings plots of HaCat cells treated with DMSO compared to the untreated control. The assignment of key absorption peaks is shown in Table S1. A significance cut-off of 0.07 was applied to PC-1 and 3, and of 0.1 was applied to PC-2. D) PCA scores plot showing the separation of the cell clusters along PC-1 and PC-3 axes.

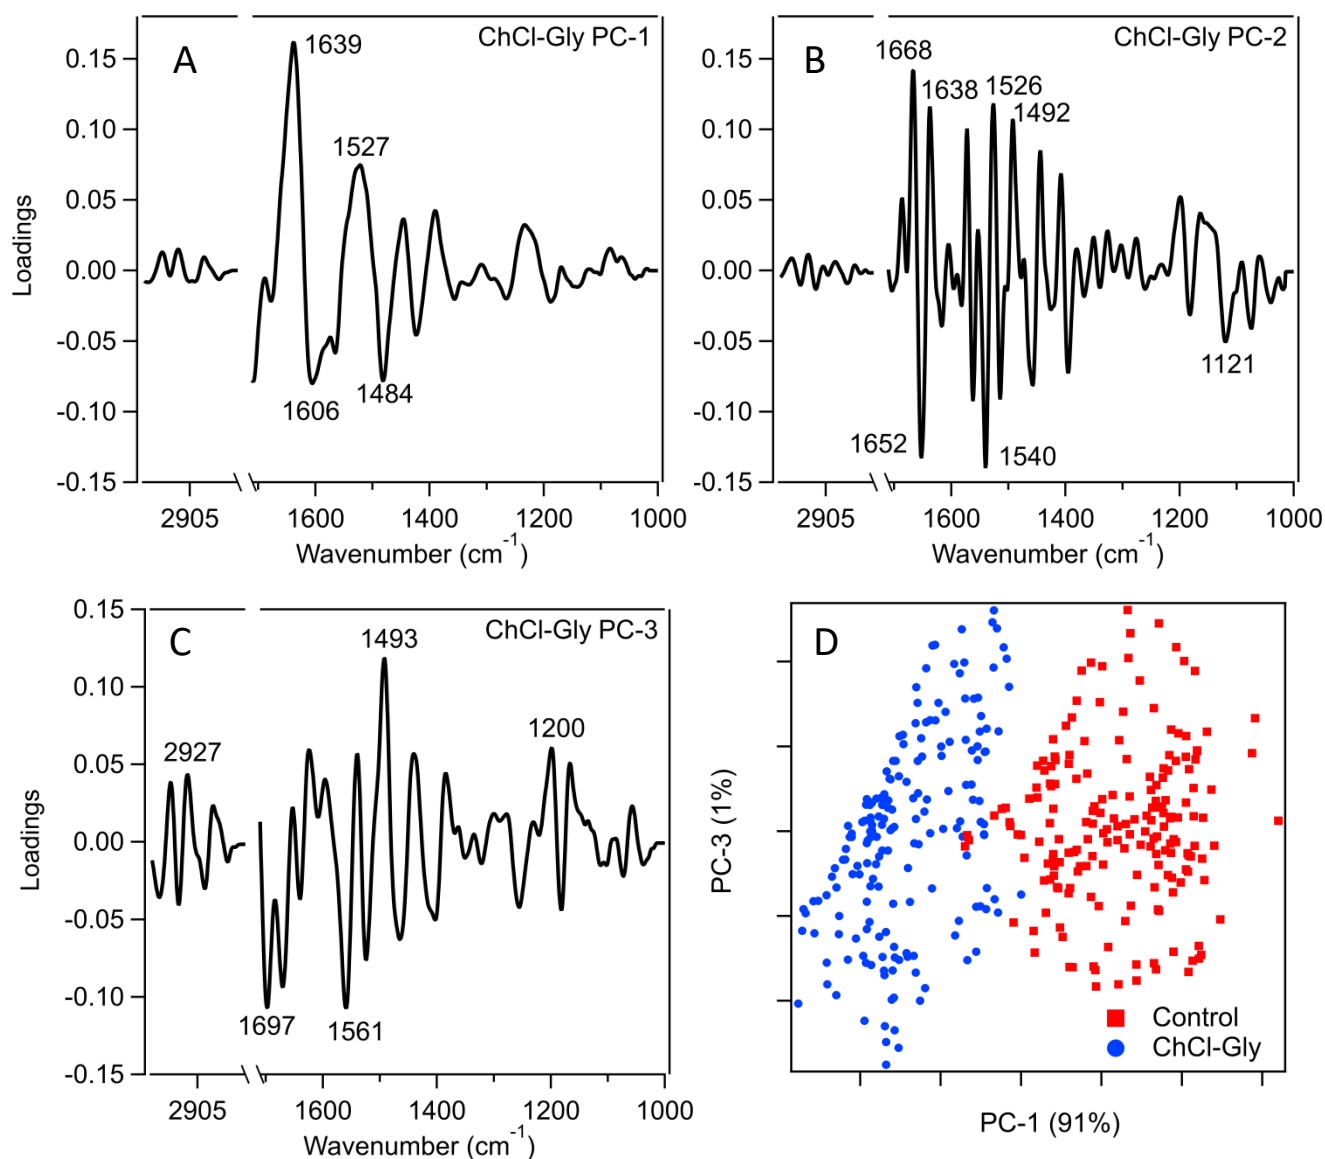

**Figure S4.** A-C) PCA loadings plot of HaCat cells treated with ChCl-Gly compared to the untreated control. The assignment of key absorption peaks is shown in Table S1. Significance cut off of 0.07 applied to PC-1 and of 0.1 to PC-2 and PC-3. D) PCA scores plot showing the separation of the cell clusters along PC-1 and PC-3 axes.

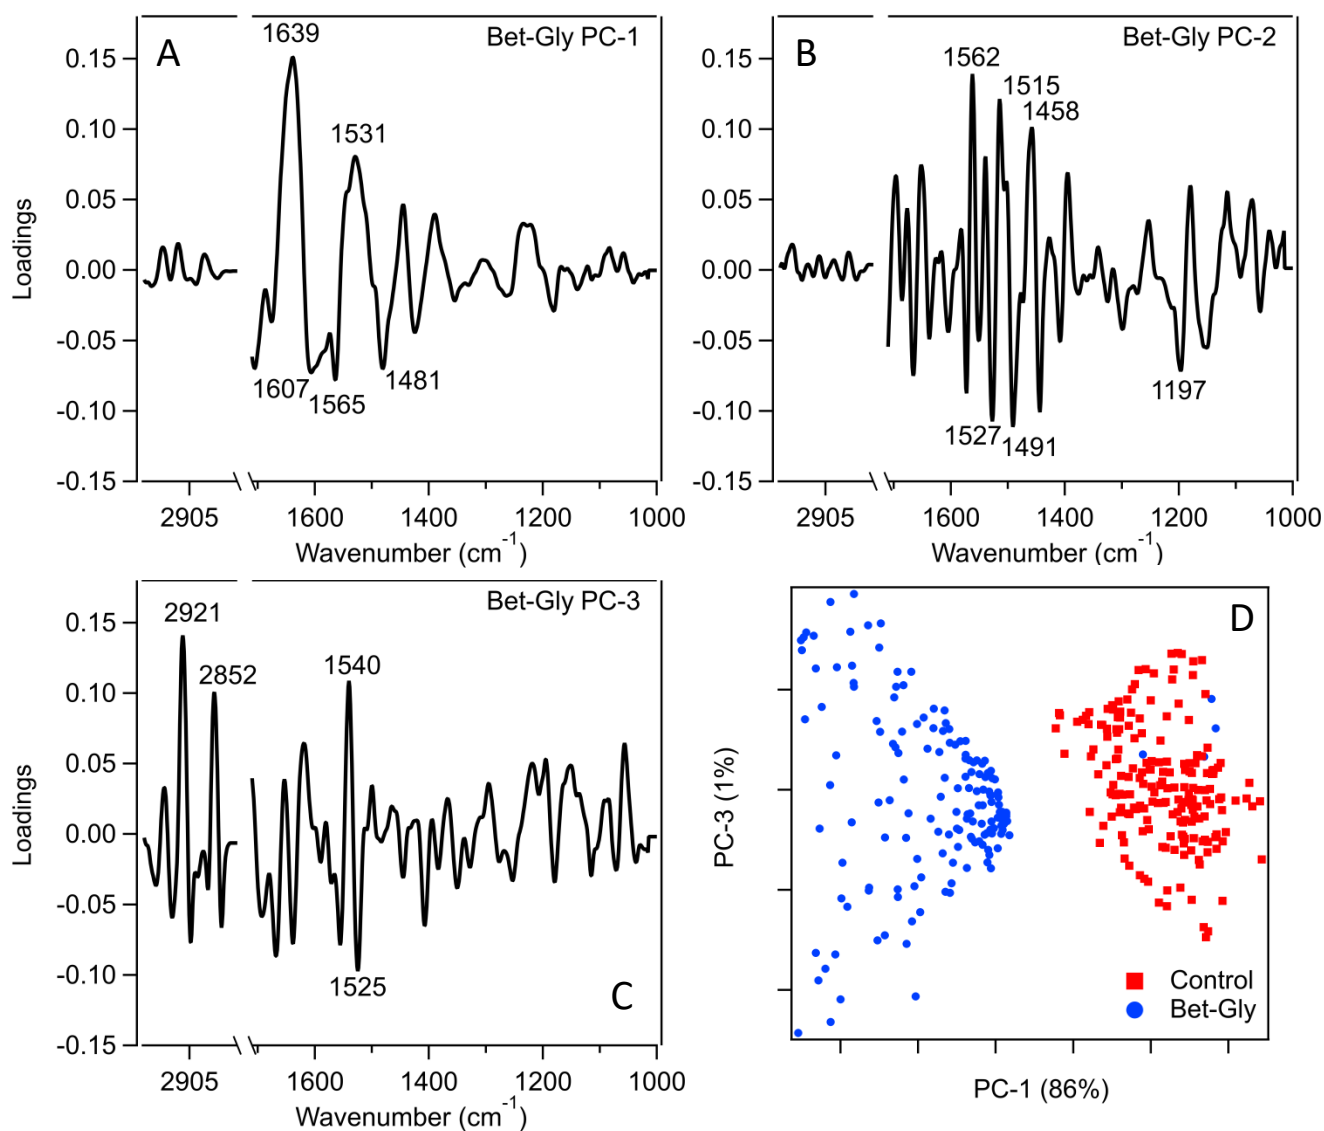

**Figure S5.** A-C) PCA loadings plots of HaCat cells treated with Bet-Gly compared to the untreated control. The assignment of key absorption peaks is shown in Table S1. Significance cut off of 0.07 applied to PC-1 and of 0.1 to PC-2 and PC-3. D) PCA scores plot showing the separation of the cell clusters along PC-1 and PC-3 axes.

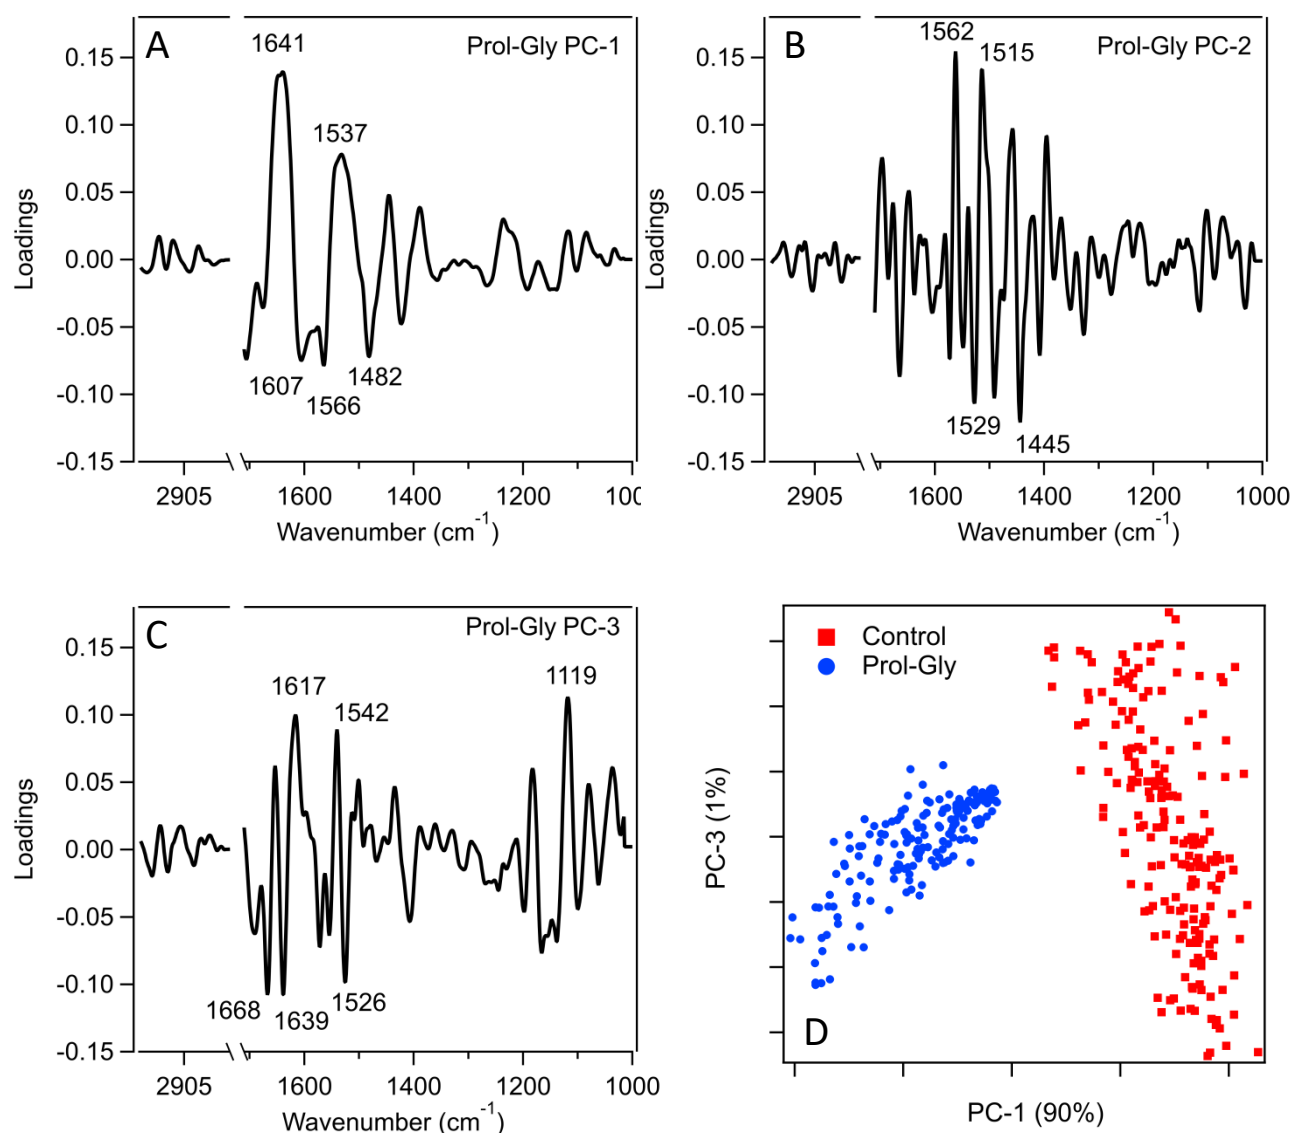

**Figure S6.** A-C) PCA loadings plots of HaCat cells treated with Prol-Gly compared to the untreated control. The assignment of key absorption peaks is shown in Table S1. A significance cut-off of 0.07 was applied to PC-1 and of 0.1 was applied to PC-2 and PC-3. D) PCA scores plot showing the separation of the cell clusters along PC-1 and PC-3 axes.

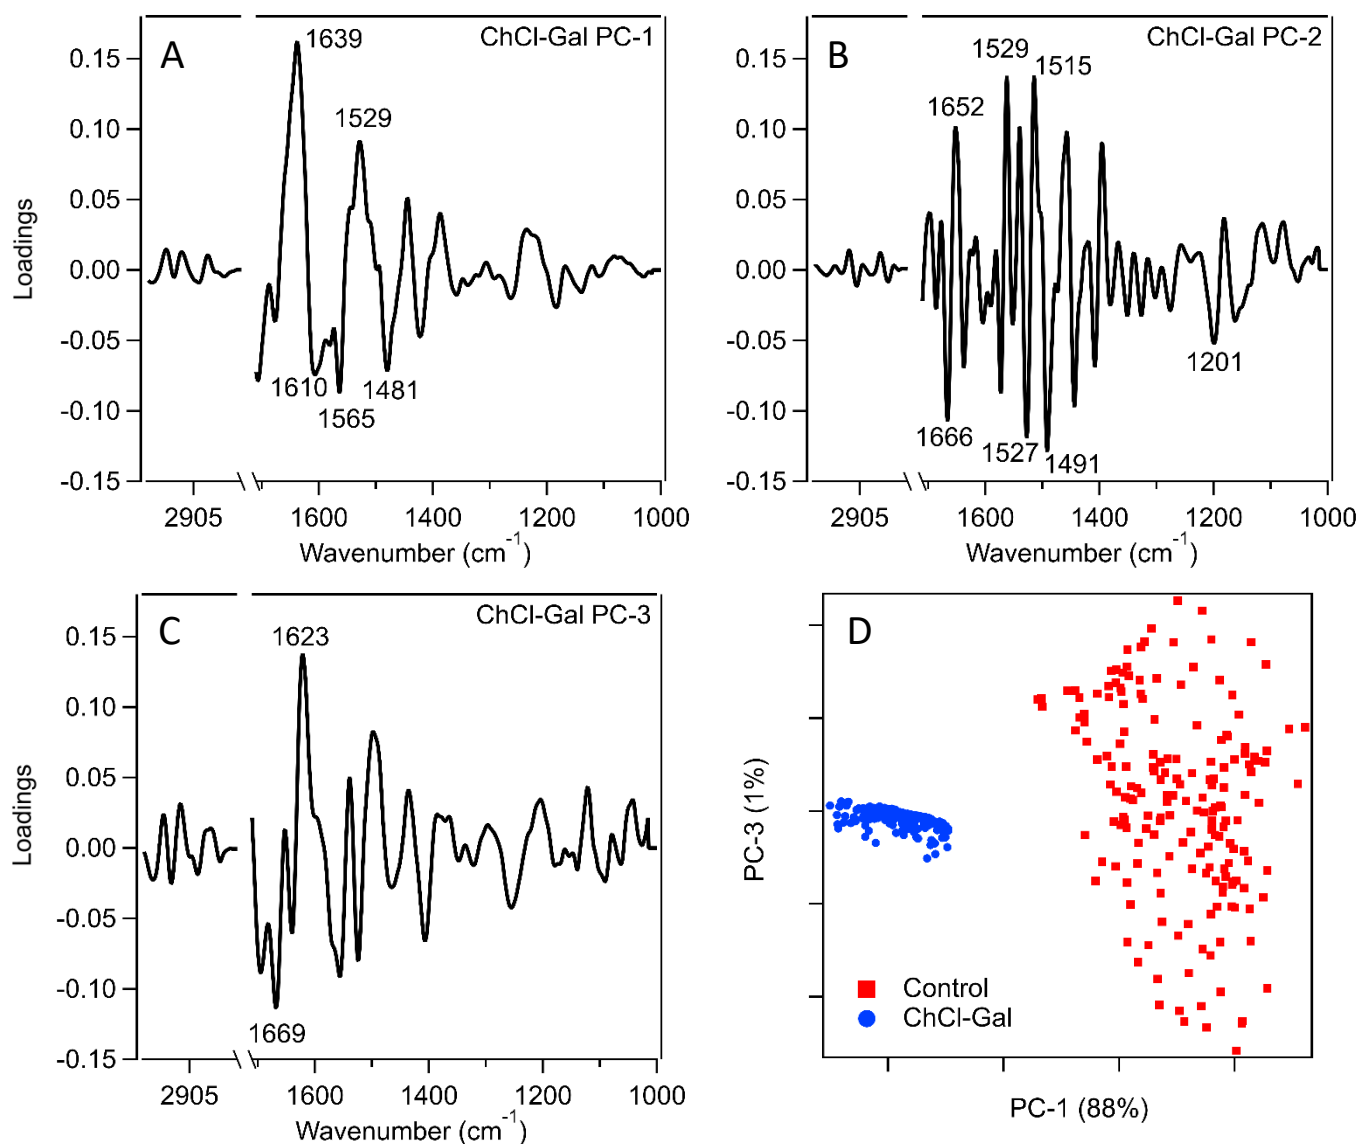

**Figure S7.** PCA loadings plots of HaCat cells treated with ChCl-Gal compared to the untreated control. The assignment of key absorption peaks is shown in Table S1. Significance cut off of 0.05 was applied to PC-1 and of 0.1 to PC-2 and PC-3. D) PCA scores plot showing the separation of the cell clusters along PC-1 and PC-3 axes.

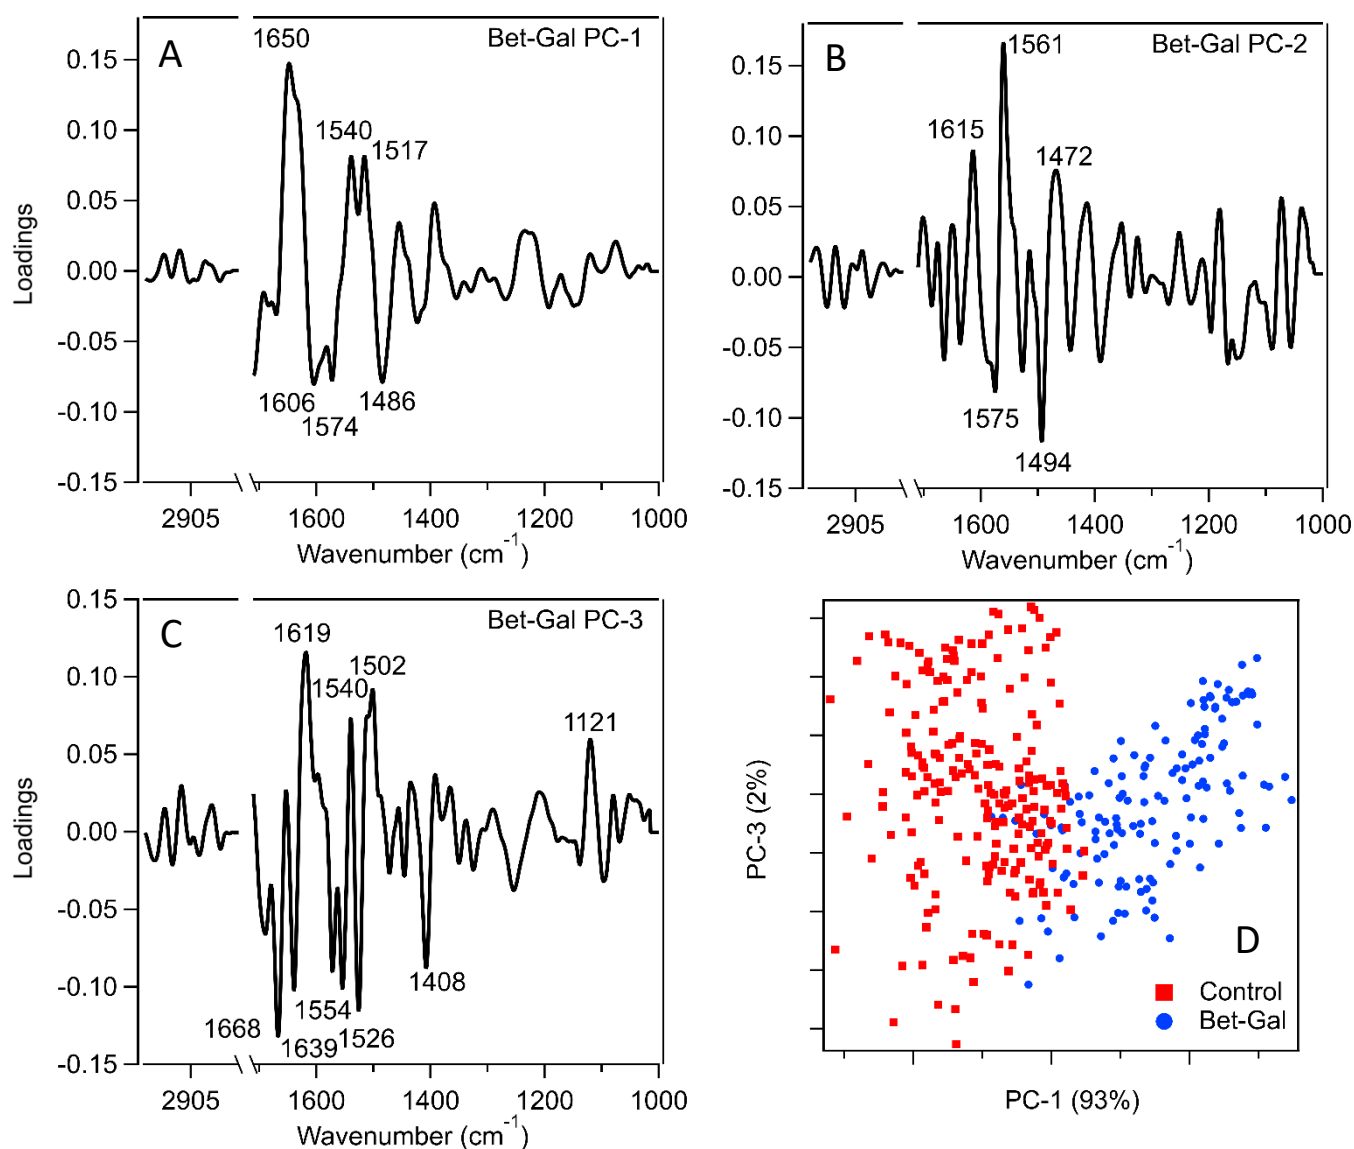

**Figure S8.** A-C) PCA loadings plots of HaCat cells treated with Bet-Gal compared to the untreated control. The assignment of key absorption peaks is shown in Table S1. A significance cut off of 0.07 was applied to PC-1 and PC-2 and of 0.1 to PC-3 D) PCA scores plot showing the separation of the cell clusters along PC-1 and PC-3 axes.

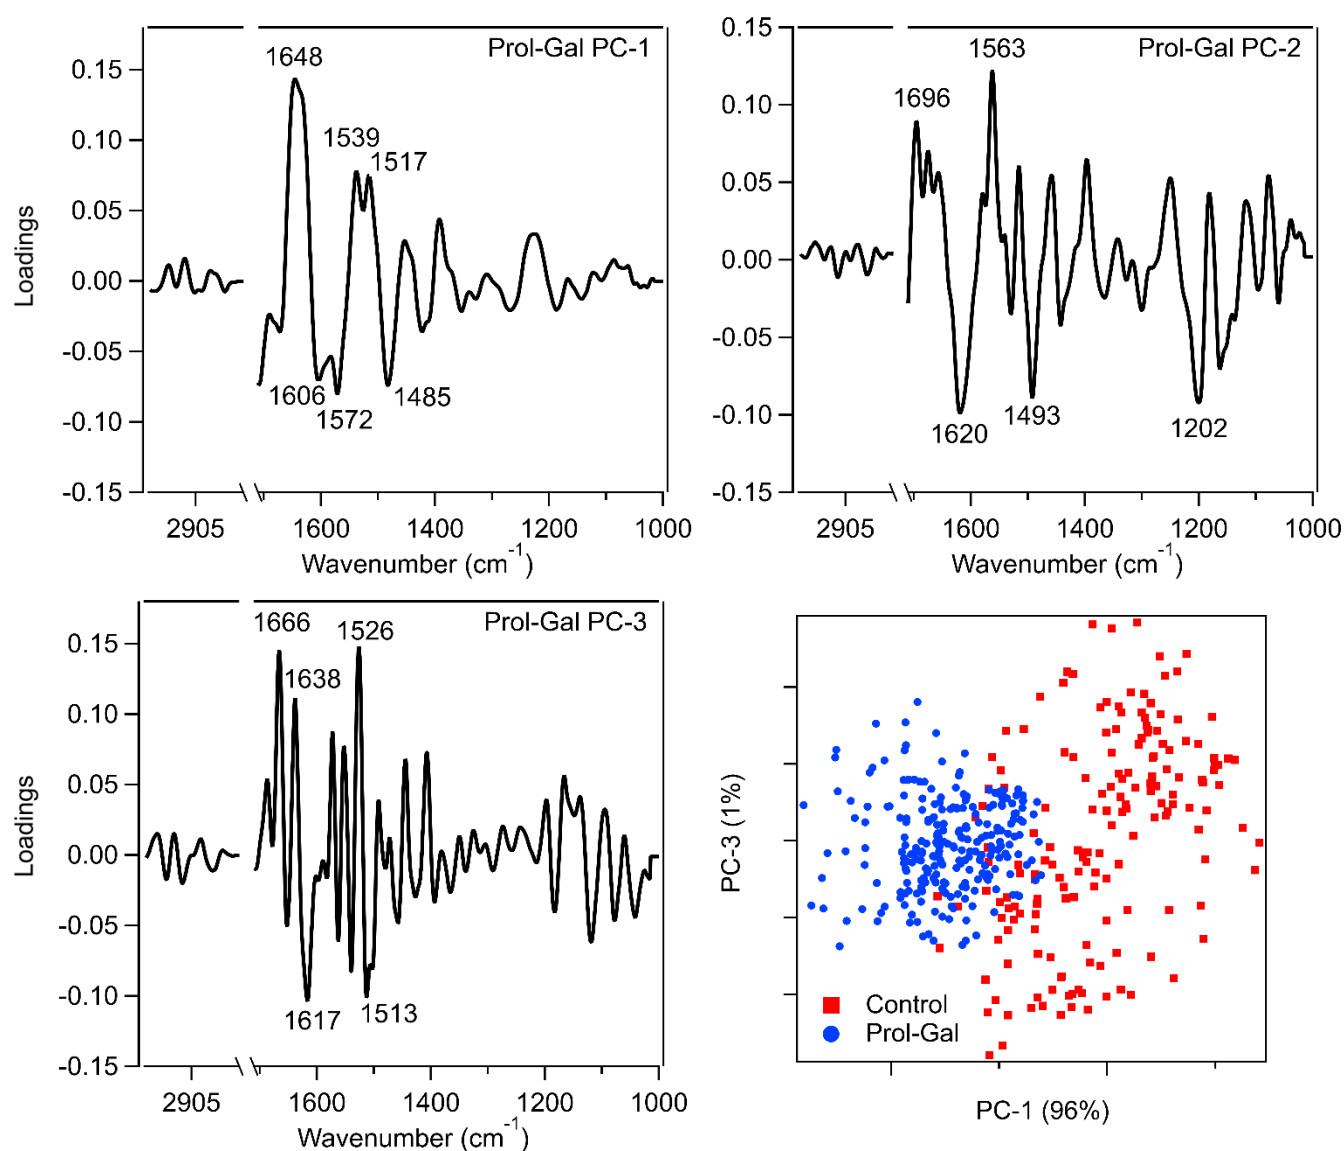

**Figure S9.** PCA loadings plots of HaCat cells treated with Prol-Gal compared to the untreated control. The assignment of key absorption peaks is shown in Table S1. Significance cut offs of 0.05, 0.07 and 0.1 were applied for PC-1, 2 and 3 respectively. D) PCA scores plot showing the separation of the cell clusters along PC-1 and PC-3 axes.

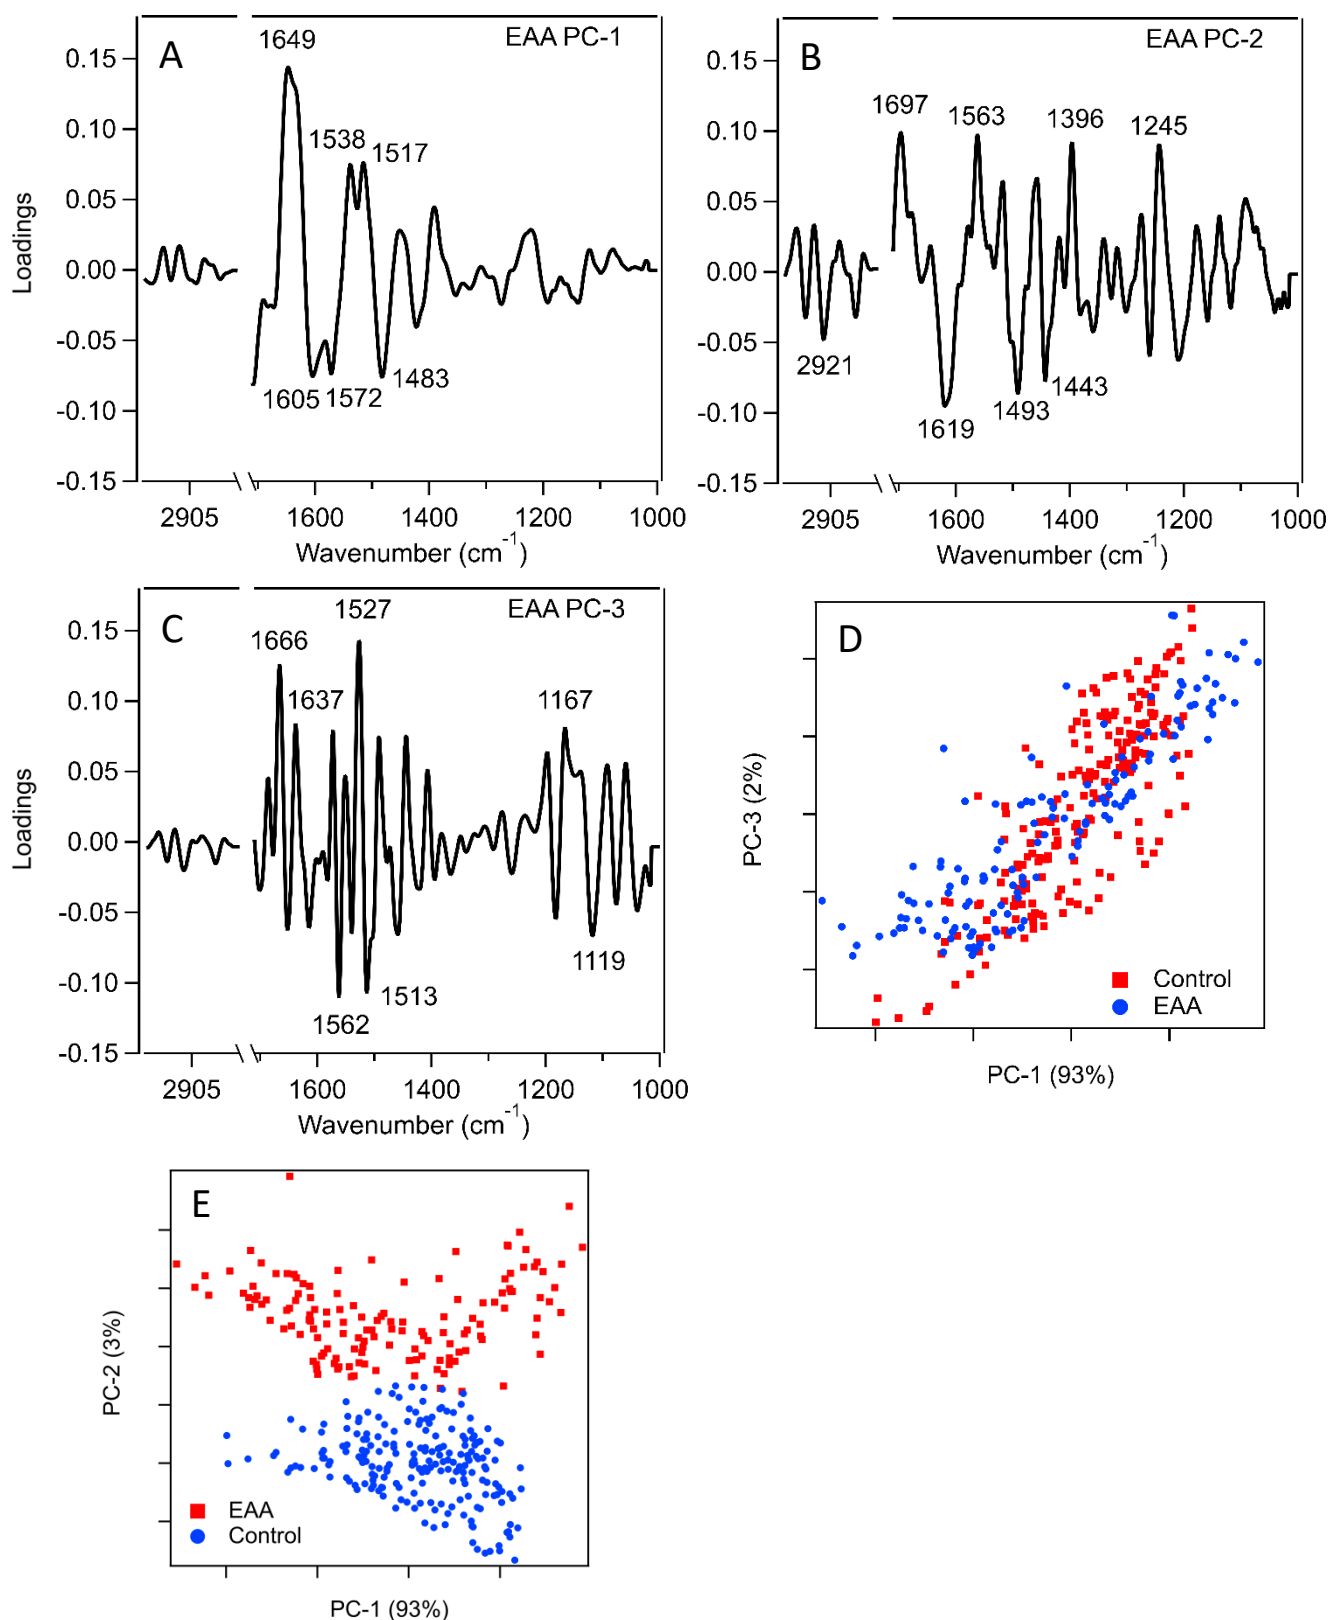

**Figure S10.** A-C) PCA loadings plots of HaCat cells treated with EAA compared to the untreated control. The assignment of key absorption peaks is shown in Table S1. A significance cut-off of 0.07 was applied to PC-1 and PC-2 and of 0.1 was applied to PC-3. D and E) PCA scores plot showing the separation of the cell clusters along PC-1, PC-2 and PC-3 axes.

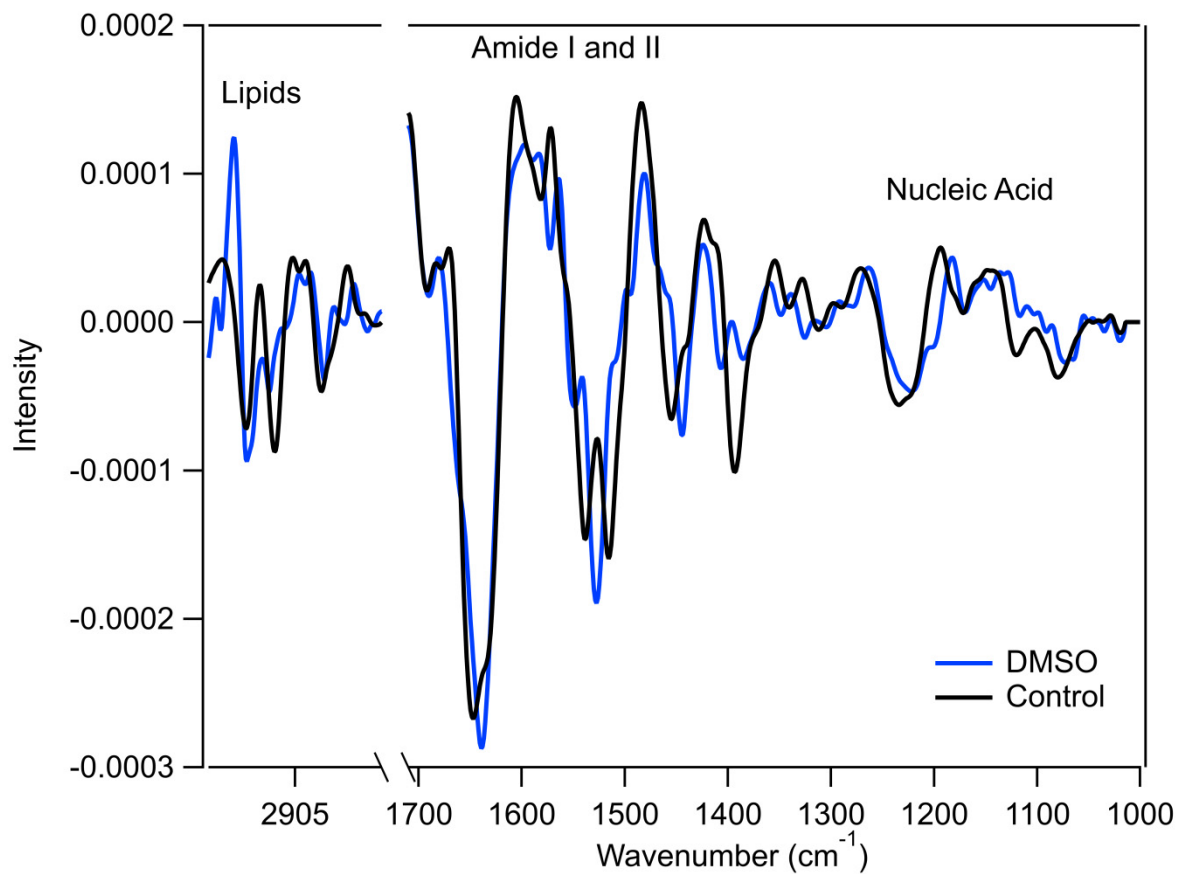

**Figure S11.** Comparison of average 2<sup>nd</sup> derivative spectra of the DMSO-treated and untreated control cells, showing the differences in the key biochemical compositions (i.e., lipids, proteins and nucleic acids).

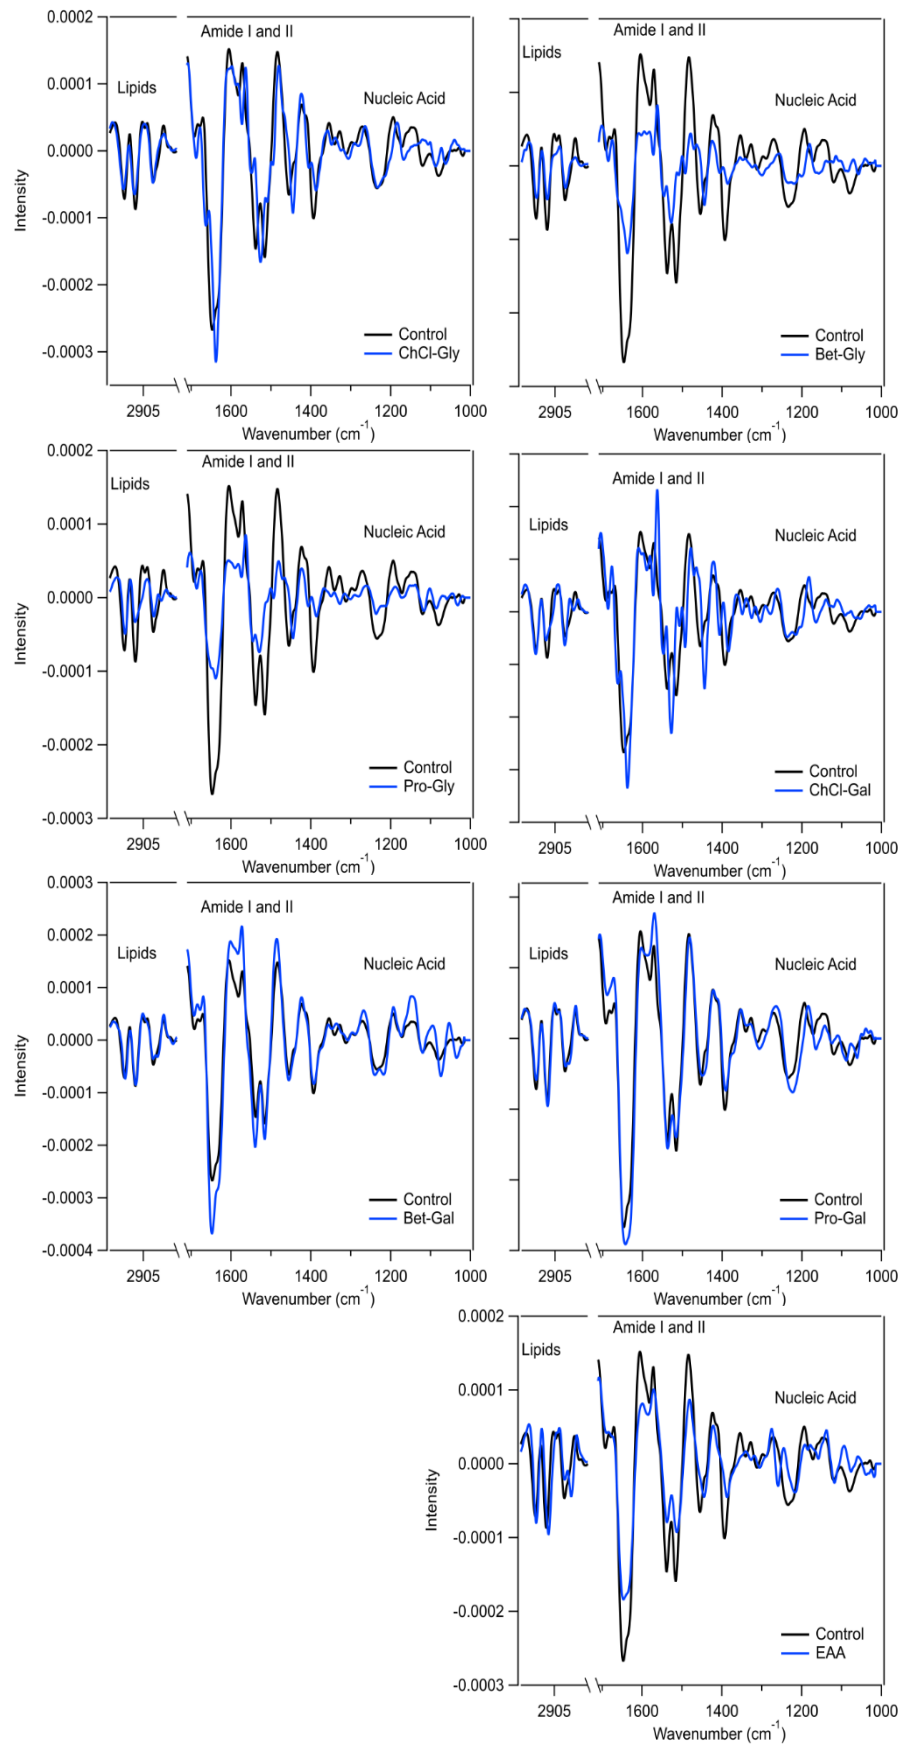

**Figure S12.** Comparison of average 2<sup>nd</sup> derivative spectra of treated cells and untreated control cells, showing the differences in the key biochemical compositions (i.e., lipids, proteins and nucleic acids).

**Table S1.** Band assignment of the loaded peaks observed in the PCA loadings plots for each treatment.

| Treatment | PC   | Wavenumber (cm <sup>-1</sup> ) | Assignment                                                                          | Broad Assignment | References |
|-----------|------|--------------------------------|-------------------------------------------------------------------------------------|------------------|------------|
| DMSO      | PC-1 | 1644                           | Amide I (C=O stretch)                                                               | Amide I          | 1, 2       |
|           |      | 1605                           | $\nu_{as}$ (COO <sup>-</sup> ) (polysaccharides, pectin)                            | Amide I          | 1          |
|           |      | 1532                           | C=N                                                                                 | Nucleic Acid     | 1, 3       |
|           |      | 1483                           | C <sub>8</sub> -H couple with a ring vibration <sup>a</sup><br>assigned to 1482/3/5 | Nucleic Acid     | 4          |
|           | PC-2 | 2979                           | Undefined                                                                           | N/A              | 1          |
|           |      | 2929                           | C-H stretching                                                                      | Lipids           | 3          |
|           |      | 1668                           | Amide I (anti-parallel $\beta$ -sheet)                                              | Amide I          | 1          |
|           |      | 1527                           | Stretching C=N, C=C                                                                 | Amide II         | 1, 3       |
|           |      | 1514                           | $\nu$ (C=C) diagnostic of the presence of carotenoid structure                      | N/A              | 1          |
|           |      | 1395                           | Undefined                                                                           | N/A              | 1          |
|           | PC-3 | 2960                           | $\nu_{as}$ (CH <sub>3</sub> )                                                       | Lipids           | 5          |
|           |      | 2918                           | C-H stretching                                                                      | Lipids           | 3          |
|           |      | 1698                           | C <sub>2</sub> =O guanine<br>N-H thymine                                            | Nucleic Acid     | 1, 3       |
|           |      | 1623                           | Base carbonyl stretching and ring breathing <sup>k</sup> Assigned to 1620           | Nucleic Acid     | 1, 6       |
|           |      | 1562                           | Ring Base                                                                           | Ring Base        | 1, 3       |
|           |      | 1493                           | In-plane CH bending vibration                                                       | Amide II         | 1          |
|           |      | 1466                           | Overlapping peak region                                                             | N/A              | 1          |
|           |      | 1444                           | Overlapping peak region                                                             | N/A              | 1          |
|           |      | 1205                           | C-O-C, C-O dominated by the ring vibrations of polysaccharides C-O-P, P-O-P         | Nucleic Acid     | 1, 7, 8    |
| ChCl-Gly  | PC-1 | 1639                           | Amide I                                                                             | Amide I          | 17         |
|           |      | 1606                           | Adenine vibration                                                                   | Nucleic Acid     | 1, 9       |
|           |      | 1527                           | Stretching C=N, C=C                                                                 | Amide II         | 1, 3       |
|           |      | 1484                           | C <sub>8</sub> -H couple with a ring vibration <sup>a</sup><br>assigned to 1482/3/5 | Nucleic Acid     | 4          |
|           | PC-2 | 1668                           | Amide I (anti-parallel $\beta$ -sheet)                                              | Amide I          | 1          |
|           |      | 1652                           | Amide I                                                                             | Amide I          | 1, 3       |
|           |      | 1638                           | Overlapping peak region                                                             | N/A              | 1          |
|           |      | 1540                           | Amide II ( $\beta$ -sheet)                                                          | Amide II         | 1, 10      |
|           |      | 1526                           | C=N                                                                                 | Nucleic Acid     | 1, 3       |
|           |      | 1492                           | Overlapping peak region                                                             | N/A              | 1          |
|           | PC-3 | 1121*                          | Symmetric phosphodiester stretching band                                            | Nucleic Acid     | 1, 11      |
|           |      | 2927                           | C-H stretching                                                                      | Lipids           | 3          |
|           |      | 1697                           | Amide I (anti-parallel $\beta$ -sheet)                                              | Amide I          | 1, 8       |
|           |      | 1561                           | Ring Base                                                                           | Ring Base        | 1, 3       |
|           |      | 1493                           | In-plane CH bending vibration                                                       | Amide II         | 1          |
| Bet-Gly   | PC-1 | 1200*                          | Phosphate (P=O) band                                                                | Nucleic Acid     | 1, 12      |
|           |      | 1639                           | Amide I                                                                             | Amide I          | 17         |
|           |      | 1607                           | Adenine vibration                                                                   | Nucleic Acid     | 1, 9       |
|           |      | 1565                           | Ring Base                                                                           | Ring Base        | 1, 3       |
|           |      | 1531                           | Undefined                                                                           | N/A              | 1          |

|          |      |       |                                                                           |              |       |
|----------|------|-------|---------------------------------------------------------------------------|--------------|-------|
|          |      | 1481  | Amide II                                                                  | Amide II     | 1, 8  |
|          | PC-2 | 1562  | Ring Base                                                                 | Ring Base    | 1, 3  |
|          |      | 1527  | Stretching C=N, C=C                                                       | Amide II     | 1, 3  |
|          |      | 1515  | $\nu$ (C=C) diagnostic of the presence of carotenoid structure            | N/A          | 1     |
|          |      | 1491  | Overlapping peak region                                                   | N/A          | 1     |
|          |      | 1458  | $\delta_{as}CH_3$ of collagen                                             | N/A          | 1, 13 |
|          |      | 1197* | Phosphate (P=O) band                                                      | Nucleic Acid | 1, 12 |
|          | PC-3 | 2921  | Asymmetric vibrations of $CH_2$ of acyl chains                            | Lipid        | 1, 14 |
|          |      | 2852  | $\nu_s CH_2$                                                              | Lipid        | 1, 5  |
|          |      | 1540  | Amide II ( $\beta$ -sheet)                                                | Amide II     | 1, 10 |
|          |      | 1525  | C=N                                                                       | Nucleic Acid | 1, 3  |
| Prol-Gly | PC-1 | 1641  | C=O stretch                                                               | Nucleic Acid | 1, 3  |
|          |      | 1607  | $\nu_{as} (COO^-)$ (polysaccharides, pectin)                              | Amide I      | 1     |
|          |      | 1566  | Ring Base                                                                 | Ring Base    | 1, 3  |
|          |      | 1537  | C=N and C=C stretch                                                       | Nucleic Acid | 1, 3  |
|          |      | 1482  | $C_8-H$ couple with a ring vibration <sup>a</sup><br>assigned to 1482/3/5 | Nucleic Acid | 1, 3  |
|          | PC-2 | 1562  | Ring Base                                                                 | Ring Base    | 1, 3  |
|          |      | 1529  | C=N                                                                       | Nucleic Acid | 1, 3  |
|          |      | 1515  | $\nu$ (C=C) diagnostic of the presence of carotenoid structure            | N/A          | 1     |
|          |      | 1445  | Overlapping peak region                                                   | N/A          | 1     |
|          | PC-3 | 1668  | Amide I (anti-parallel $\beta$ -sheet)                                    | Amide I      | 1     |
|          |      | 1639  | Amide I                                                                   | Amide I      | 17    |
|          |      | 1617  | Ring C-C stretch of aromatic                                              | Amide I      | 1     |
|          |      | 1542  | Amide II                                                                  | Amide II     | 1, 15 |
|          |      | 1526  | C=N                                                                       | Nucleic Acid | 1, 3  |
|          |      | 1119  | C-O stretching mode                                                       | N/A          | 1     |
| ChCl-Gal | PC-1 | 1639  | Amide I                                                                   | Amide I      | 17    |
|          |      | 1610  | Adenine vibration                                                         | Nucleic Acid | 1, 9  |
|          |      | 1565  | Ring Base                                                                 | Ring Base    | 1, 3  |
|          |      | 1529  | Stretching C=N, C=C                                                       | Amide II     | 1, 3  |
|          |      | 1481  | Amide II                                                                  | Amide II     | 1, 8  |
|          | PC-2 | 1666  | Amide I                                                                   | Amide I      | 1     |
|          |      | 1652  | Amide I                                                                   | Amide I      | 1, 3  |
|          |      | 1529  | Stretching C=N, C=C                                                       | Amide II     | 1, 3  |
|          |      | 1527  | Stretching C=N, C=C                                                       | Amide II     | 1, 3  |
|          |      | 1491  | Overlapping peak region                                                   | N/A          | 1     |
|          |      | 1201* | $PO_2^-$ asymmetric (phosphate I)                                         | Nucleic Acid | 1, 3  |
|          | PC-3 | 1669  | Amide I (anti-parallel $\beta$ -sheet)                                    | Amide I      | 1     |
|          |      | 1623  | Base carbonyl stretching and ring breathing <sup>k</sup> Assigned to 1620 | Nucleic Acid | 1, 6  |
| Bet-Gal  | PC-1 | 1650  | Amide I                                                                   | Amide I      | 1, 3  |
|          |      | 1606  | Overlapping peak region                                                   | N/A          | 1     |
|          |      | 1574  | C=N Adenine                                                               | Nucleic Acid | 1, 3  |
|          |      | 1540  | Amide II ( $\beta$ -sheet)                                                | Amide II     | 1, 10 |
|          |      | 1517  | Amide II                                                                  | Amide II     | 1     |
|          |      | 1486  | Overlapping peak region                                                   | N/A          | 1     |
|          | PC-2 | 1615  | Ring C-C stretch of aromatic                                              | Amide I      | 1     |

|          |      |       |                                                                                     |              |          |
|----------|------|-------|-------------------------------------------------------------------------------------|--------------|----------|
|          |      | 1574  | C=N Adenine                                                                         | Nucleic Acid | 1, 3     |
|          |      | 1561  | Ring Base                                                                           | Ring Base    | 1, 3     |
|          |      | 1494  | Overlapping peak region                                                             | N/A          | 1        |
|          |      | 1472  | Overlapping peak region                                                             | N/A          | 1        |
|          | PC-3 | 1668  | Amide I (anti-parallel $\beta$ -sheet)                                              | Amide I      | 1        |
|          |      | 1639  | Amide I                                                                             | Amide I      | 17       |
|          |      | 1619  | Ring C-C stretch of aromatic                                                        | Amide I      | 1        |
|          |      | 1554  | Amide II ( $\alpha$ -sheet)                                                         | Amide II     | 18       |
|          |      | 1540  | Amide II ( $\beta$ -sheet)                                                          | Amide II     | 1, 10    |
|          |      | 1526  | C=N                                                                                 | Nucleic Acid | 1, 3     |
|          |      | 1502  | Amide II                                                                            | Amide II     | 1        |
|          |      | 1408  | Overlapping peak region                                                             | N/A          | 1        |
|          |      | 1121* | Symmetric phosphodiester stretching band                                            | Nucleic Acid | 1, 11    |
| Prol-Gal | PC-1 | 1648  | Unordered random coils                                                              | Amide I      | 1        |
|          |      | 1606  | $\nu_{as}$ (COO <sup>-</sup> ) (polysaccharides, pectin)                            | Amide I      | 1        |
|          |      | 1572  | Amide II                                                                            | Amide II     | 1        |
|          |      | 1539  | Amide II                                                                            | Amide II     | 1        |
|          |      | 1517  | Amide II                                                                            | Amide II     | 1        |
|          |      | 1485  | C <sub>8</sub> -H couple with a ring vibration <sup>a</sup><br>assigned to 1482/3/5 | Nucleic Acid | 4        |
|          | PC-2 | 1696  | Amide I (anti-parallel $\beta$ -sheet)                                              | Amide I      | 1, 8     |
|          |      | 1620  | Base carbonyl stretching and ring breathing <sup>k</sup> Assigned to 1620           | Nucleic Acid | 1, 6     |
|          |      | 1563  | Ring Base                                                                           | Ring Base    | 1, 3     |
|          |      | 1493  | In-plane CH bending vibration                                                       | Amide II     | 1        |
|          |      | 1202  | PO <sub>2</sub> <sup>-</sup> asymmetric (phosphate I)                               | Nucleic Acid | 1, 3     |
|          | PC-3 | 1666  | Amide I                                                                             | Amide I      | 1        |
|          |      | 1638  | Overlapping peak region                                                             | N/A          | 1        |
|          |      | 1617  | Ring C-C stretch of aromatic                                                        | Amide I      | 1        |
|          |      | 1526  | C=N                                                                                 | Nucleic Acid | 1, 3     |
|          |      | 1513  | $\nu$ (C=C) diagnostic of the presence of carotenoid structure                      | N/A          | 1        |
| EAA      | PC-1 | 1649  | Unordered random coils                                                              | Amide I      | 1        |
|          |      | 1605  | $\nu_{as}$ (COO <sup>-</sup> ) (polysaccharides, pectin)                            | Amide I      | 1        |
|          |      | 1572  | Amide II                                                                            | Amide II     | 1        |
|          |      | 1538  | C=N and C=C stretch                                                                 | Nucleic Acid | 1, 3     |
|          |      | 1517  | Amide II                                                                            | Amide II     | 1        |
|          |      | 1483  | C <sub>8</sub> -H couple with a ring vibration <sup>a</sup><br>assigned to 1482/3/5 | Nucleic Acid | 1, 3     |
|          | PC-2 | 2921  | Asymmetric vibrations of CH <sub>2</sub> of acyl chains                             | Lipid        | 1, 14    |
|          |      | 1697  | Amide I (anti-parallel $\beta$ -sheet)                                              | Amide I      | 1, 8     |
|          |      | 1619  | Ring C-C stretch of aromatic                                                        | Amide I      | 1        |
|          |      | 1563  | Ring Base                                                                           | Ring Base    | 1, 3     |
|          |      | 1493  | In-plane CH bending vibration                                                       | Amide II     | 1        |
|          |      | 1443  | Overlapping peak region                                                             | N/A          | 1        |
|          |      | 1396  | Overlapping peak region                                                             | N/A          | 1        |
|          |      | 1245  | PO <sub>2</sub> <sup>-</sup> asymmetric                                             | Nucleic Acid | 1        |
|          | PC-3 | 1666  | Amide I                                                                             | Amide I      | 1        |
|          |      | 1637  | Amide I ( $\beta$ -sheet)                                                           | Amide I      | 1, 8, 14 |

|  |  |      |                                                                |           |      |
|--|--|------|----------------------------------------------------------------|-----------|------|
|  |  | 1562 | Ring Base                                                      | Ring Base | 1, 3 |
|  |  | 1527 | Stretching C=N, C=C                                            | Amide II  | 1, 3 |
|  |  | 1513 | $\nu$ (C=C) diagnostic of the presence of carotenoid structure | N/A       | 1    |
|  |  | 1167 | Overlapping peak region                                        | N/A       | 1    |
|  |  | 1119 | C-O stretching mode                                            | N/A       | 1    |

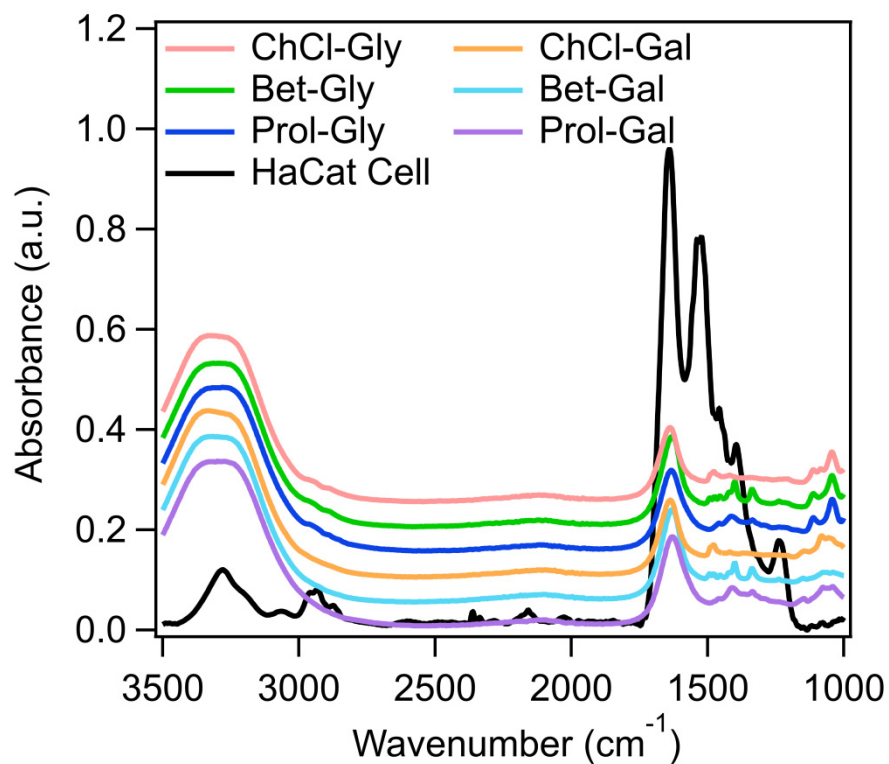

**Figure S13.** FTIR spectra of the deep eutectic solvents used in this study.

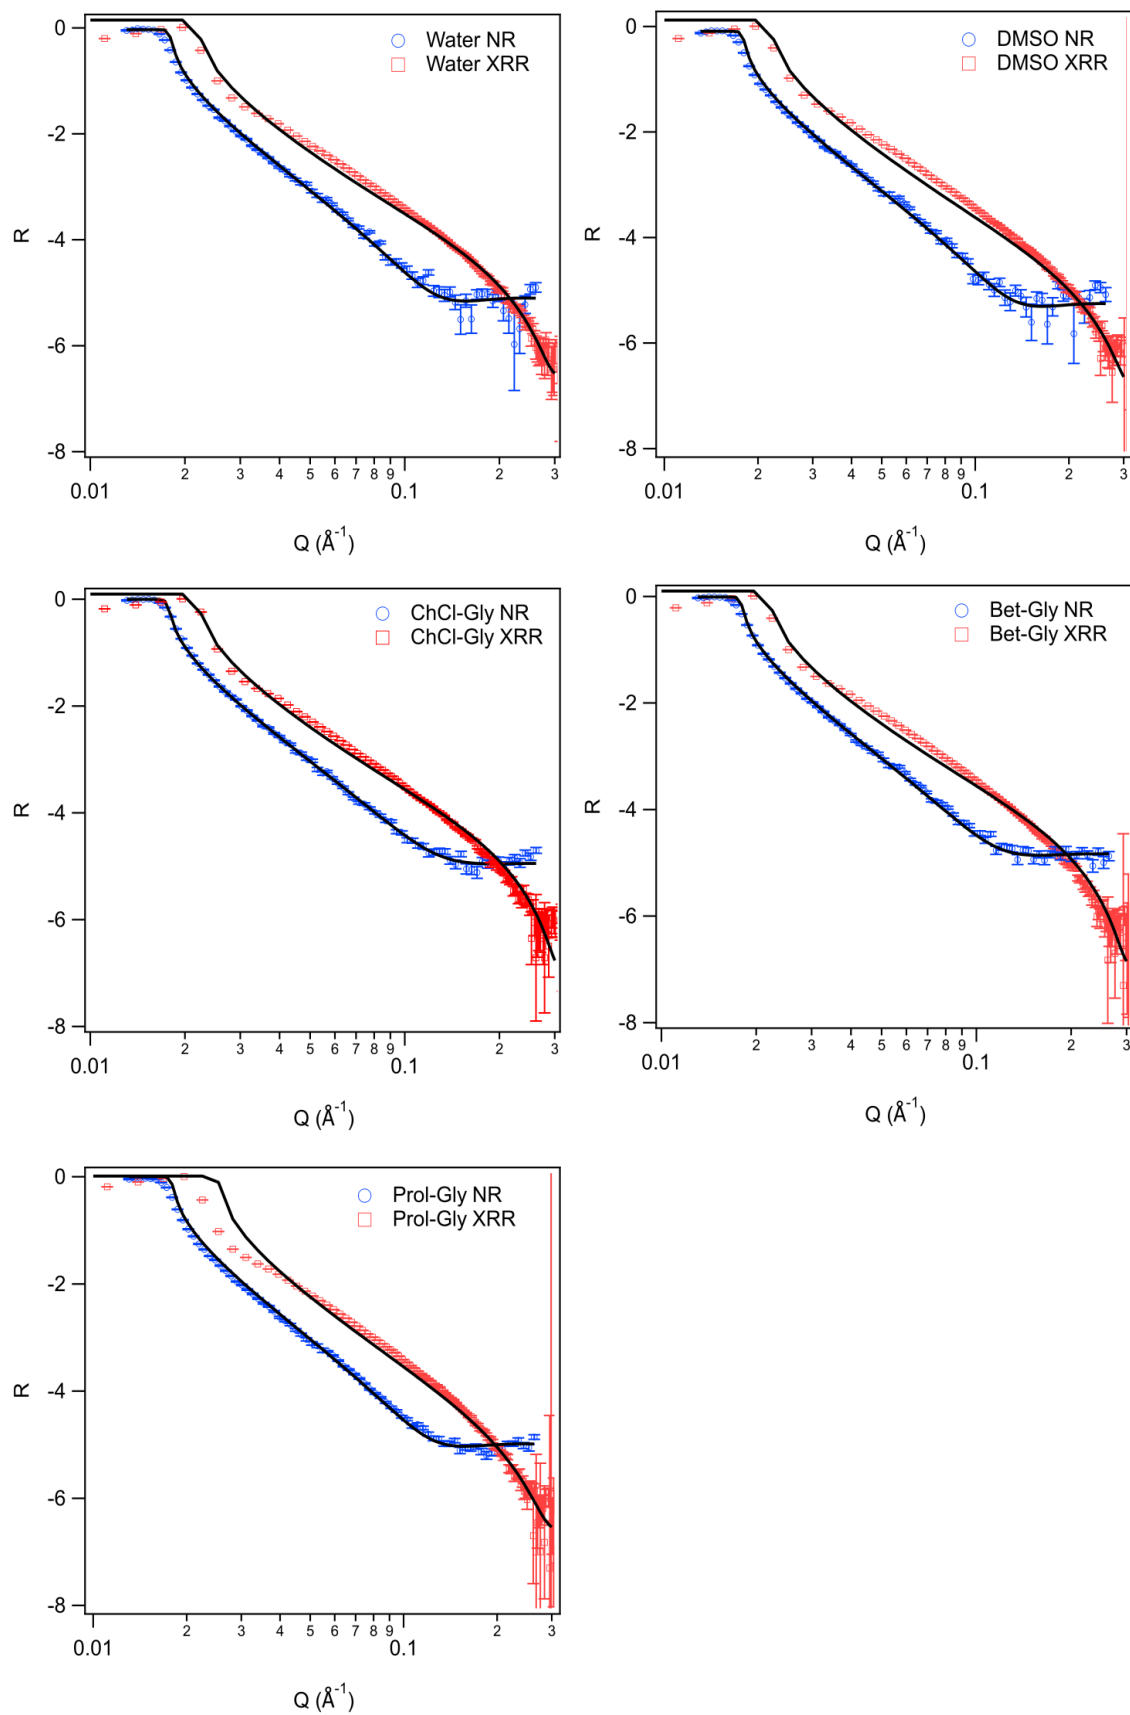

**Figure S14.** Neutron and X-ray reflectivity data with best fits for a POPC monolayer.

## References

1. Z. Movasaghi, S. Rehman and D. I. ur Rehman, *Applied Spectroscopy Reviews*, 2008, **43**, 134-179.
2. M. Huleihel, A. Salman, V. Erukhimovitch, J. Ramesh, Z. Hammody and S. Mordechai, *Journal of Biochemical and Biophysical Methods*, 2002, **50**, 111-121.
3. G. I. Dovbeshko, N. Y. Gridina, E. B. Kruglova and O. P. Pashchuk, *Talanta*, 2000, **53**, 233-246.
4. N. Fujioka, Y. Morimoto, T. Arai and M. Kikuchi, *Cancer Detection and Prevention*, 2004, **28**, 32-36.
5. C. Paluszkiwicz and W. M. Kwiatak, *Journal of Molecular Structure*, 2001, **565-566**, 329-334.
6. L. Chiriboga, P. Xie, H. Yee, V. Vigorita, D. Zarou, D. Zakim and M. Diem, *Biospectroscopy*, 1998, **4**, 47-53.
7. Y. Yang, J. Sulé-Suso, G. D. Sockalingum, G. Kegelaer, M. Manfait and A. J. El Haj, *Biopolymers*, 2005, **78**, 311-317.
8. R. Eckel, H. Huo, H.-W. Guan, X. Hu, X. Che and W.-D. Huang, *Vibrational Spectroscopy*, 2001, **27**, 165-173.
9. G. I. Dovbeshko, V. I. Chegel, N. Y. Gridina, O. P. Repnytska, Y. M. Shirshov, V. P. Tryndiak, I. M. Todor and G. I. Solyanik, *Biopolymers*, 2002, **67**, 470-486.
10. E. Gazi, J. Dwyer, P. Gardner, A. Ghanbari-Siahkali, A. P. Wade, J. Miyan, N. P. Lockyer, J. C. Vickerman, N. W. Clarke, J. H. Shanks, L. J. Scott, C. A. Hart and M. Brown, *J Pathol*, 2003, **201**, 99-108.
11. P. G. Andrus and R. D. Strickland, *Biospectroscopy*, 1998, **4**, 37-46.
12. S. Yoshida, M. Miyazaki, K. Sakai, M. Takeshita, S. Yuasa, A. Sato, T. Kobayashi, S. Watanabe and H. Okuyama, *Biospectroscopy*, 1997, **3**, 281-290.
13. M. F. K. Fung, M. K. Senterman, N. Z. Mikhael, S. Lacelle and P. T. T. Wong, *Biospectroscopy*, 1996, **2**, 155-165.
14. H. Fabian, M. Jackson, L. Murphy, P. H. Watson, I. Fichtner and H. H. Mantsch, *Biospectroscopy*, 1995, **1**, 37-45.
15. B. R. Wood, M. A. Quinn, B. Tait, M. Ashdown, T. Hislop, M. Romeo and D. McNaughton, *Biospectroscopy*, 1998, **4**, 75-91.
